# Supplementary material for: Surface Enhanced Raman Spectroscopy (SERS) for the Multiplex Detection of Braf, Kras, and Pik3ca Mutations in Plasma of Colorectal Cancer Patients
Source: PubMed Central journal article supplement — Theranostics. 2018 Feb 12;8(6):1678–89. doi: 10.7150/thno.22502 (PMC5858175; doi:10.7150/thno.22502), 2018-02-12
Supplement: thnov08p1678s1.pdf [file thnov08p1678s1.pdf]

Table S1. MLR coefficients representing mutation rates

|           | Ref1         | Ref2        | Ref3         | Ref4         | Ref5         | Ref6        |
|-----------|--------------|-------------|--------------|--------------|--------------|-------------|
| Sample 1  | 0.01833083   | 0.011771257 | 0.049015334  | 0.035585523  | 0.02029937   | 0.01386107  |
| Sample 2  | 0.012635604  | 0.054551679 | 0.018119244  | 0.031400343  | 0.030192116  | 0.01537179  |
| Sample 3  | 0.013948088  | 0.026139348 | 0.019265253  | 0.039561482  | 0.832173523  | 0.01215086  |
| Sample 4  | 0.03251846   | 0.040946986 | 0.029043453  | 0.059512464  | 0.033805617  | 0.03873657  |
| Sample 5  | -0.003474715 | 0.022763874 | 0.829655144  | 0.048042985  | 0.77873142   | 0.06444665  |
| Sample 6  | 0.022657083  | 0.019969205 | 0.026268125  | 0.046200076  | 0.046068431  | 0.01642948  |
| Sample 7  | -0.010260818 | 0.047719392 | 0.017915552  | 0.078503862  | -0.00164113  | 0.62755189  |
| Sample 8  | -0.00106987  | 0.042044514 | 0.043256147  | 0.037793688  | 0.055144315  | 0.01668996  |
| Sample 9  | 0.041480141  | 0.042565178 | 0.028841531  | 0.037708305  | 0.00645159   | 0.03395289  |
| Sample 10 | 0.028622944  | 0.038972889 | 0.021151673  | 0.051928617  | 0.011307773  | 0.00869329  |
| Sample 11 | 0.023283945  | 0.045279745 | 0.027162816  | -0.000198442 | 0.023748399  | 0.01556098  |
| Sample 12 | 0.029396938  | 0.000767436 | 0.016049996  | 0.018090098  | 0.027518234  | 0.03623291  |
| Sample 13 | 0.020690784  | 0.038122164 | 0.017514234  | 0.053583974  | 0.047413166  | 0.01976667  |
| Sample 14 | 0.018668068  | 0.054485693 | 0.762607642  | 0.064877191  | 0.805272037  | 0.04649923  |
| Sample 15 | 0.001811484  | 0.031632804 | 0.73002037   | 0.046698681  | 0.017540024  | 0.03123178  |
| Sample 16 | 0.026582894  | 0.042071234 | 0.006081364  | 0.030257897  | 0.03575038   | 0.04201079  |
| Sample 17 | 0.013887379  | 0.021150917 | -0.008664327 | 0.805328842  | 0.764779642  | -0.01165928 |
| Sample 18 | 0.037281121  | 0.014170408 | 0.023027859  | 0.037304172  | 0.02556879   | 0.04668841  |
| Sample 19 | 0.016152923  | 0.010962988 | 0.004335041  | 0.049072329  | 0.01759337   | 0.01348296  |
| Sample 20 | 0.032599761  | 0.015604442 | 0.040093028  | 0.033979112  | 0.022626987  | 0.01543077  |
| Sample 21 | 0.018887473  | 0.036581214 | 0.044186429  | 0.027151465  | 0.018017818  | 0.04963495  |
| Sample 22 | 0.013427605  | 0.030293751 | 0.018067294  | 0.683464972  | 0.033627527  | 0.04213587  |
| Sample 23 | 0.879838483  | 0.057358725 | -0.012353311 | 0.746792666  | 0.054722945  | 0.03887847  |
| Sample 24 | 0.013493398  | 0.014370327 | 0.041942228  | 0.039349158  | 0.492764135  | 0.02582261  |
| Sample 25 | 0.001549749  | 0.056746159 | 0.509983058  | 0.026753355  | 0.044085662  | 0.02389978  |
| Sample 26 | 0.016052958  | 0.053335395 | 0.031234893  | 0.03666066   | 0.039140617  | 0.02793508  |
| Sample 27 | 0.02543537   | 0.013017211 | 0.012324091  | 0.040891265  | 0.033537636  | 0.04592844  |
| Sample 28 | 0.041649473  | 0.016980444 | -0.005425846 | 0.052099812  | 0.040368739  | 0.01136782  |
| Sample 29 | 0.004889117  | 0.025749114 | 0.02781067   | 0.046461058  | 0.011611746  | 0.0218387   |
| Sample 30 | 0.007158549  | 0.051988246 | 0.007894975  | 0.058677279  | 0.034326809  | 0.03907861  |
| Sample 31 | 0.003720849  | 0.038307886 | 0.032923309  | 0.019840864  | 0.041146182  | 0.04852442  |
| Sample 32 | 0.032724811  | 0.020782472 | 0.037985147  | 0.023221847  | 0.020174318  | 0.02243739  |
| Sample 33 | 0.008486469  | 0.049271089 | 0.594302435  | 0.047423152  | 0.012969431  | 0.03241665  |
| Sample 34 | 0.00821056   | 0.042628645 | 0.034045461  | 0.020398464  | 0.022903219  | 0.03742224  |
| Sample 35 | 0.044147299  | 0.025908936 | 0.029870042  | 0.037545511  | 0.016603581  | 0.02633949  |
| Sample 36 | 0.028613211  | 0.016634585 | 0.033989212  | 0.055846107  | 0.052158538  | 0.04866126  |
| Sample 37 | 0.022540448  | 0.021975276 | 0.693473188  | 0.06113037   | -0.010575133 | 0.63103711  |
| Sample 38 | 0.014161516  | 0.023752322 | -0.003645193 | 0.032719465  | 0.021483446  | 0.02176692  |

|           |              |             |             |             |              |            |
|-----------|--------------|-------------|-------------|-------------|--------------|------------|
| Sample 39 | 0.020303811  | 0.018407576 | 0.005066505 | 0.051451388 | 0.036366621  | 0.01416848 |
| Sample 40 | -0.017326507 | 0.526649434 | 0.609736255 | 0.082883001 | 0.020673967  | 0.02403531 |
| Sample 41 | 0.007777003  | 0.034676277 | 0.015803155 | 0.063521252 | 0.033450177  | 0.03347672 |
| Sample 42 | 0.016519482  | 0.058571926 | 0.029832303 | 0.055928359 | 0.011634425  | 0.01897266 |
| Sample 43 | 0.749185624  | 0.033983014 | 0.03265475  | 0.531471443 | 0.025782716  | 0.01844502 |
| Sample 44 | 0.821136824  | 0.020857986 | 0.001193472 | 0.055005407 | 0.037625691  | 0.05758862 |
| Sample 45 | 0.017797025  | 0.020513292 | 0.031781924 | 0.013029023 | 0.019034417  | 0.02746867 |
| Sample 46 | 0.020608823  | 0.018606932 | 0.018120005 | 0.025849378 | 0.029730753  | 0.01687926 |
| Sample 47 | 0.005549435  | 0.032689523 | 0.009214488 | 0.047056846 | 0.01109111   | 0.01490697 |
| Sample 48 | 0.001824699  | 0.839322169 | 0.03891019  | 0.044847907 | -0.003553677 | 0.06361542 |
| Sample 49 | 0.021451086  | 0.03863242  | 0.033038802 | 0.045454941 | 0.030116394  | 0.04712554 |
